# Supplementary material
Source: publisher figshare collection journal article supplement (https://tandf.figshare.com/articles/dataset/_/1493055)
Supplement: Supplementary file 1 [file 3]

SUPPLEMENTARY APPENDIX 1. Dental measurements of *Paratoceras* from the early Miocene of Panama. **Abbreviations:** **APL**, anterior-posterior length. **TWmx**: maximum transverse width. **TWHyd**: transverse hypoconulid width. \*: highly deformed fossils excluded from the statistical summary.

| UF                |                |                |          |           |            |
|-------------------|----------------|----------------|----------|-----------|------------|
| Taxon             | Catalog number | Tooth position | APL (mm) | TWmx (mm) | TWHyd (mm) |
| <i>P. coatesi</i> | UF 271182      | Rp1            | 6.36     | 3.55      | -          |
| <i>P. coatesi</i> | UF 271623      | Lp1            | 6.26     | 3.62      | -          |
| <i>P. coatesi</i> | UF 271181      | Rp2            | 13.74    | 6.10      | -          |
| <i>P. coatesi</i> | UF 267123*     | Lp2            | 14.31    | 5.76      | -          |
| <i>P. coatesi</i> | UF 271182      | Rp3            | 13.99    | 6.29      | -          |
| <i>P. coatesi</i> | UF 271624*     | Rp3            | 15.50    | 6.03      | -          |
| <i>P. coatesi</i> | UF 223328*     | Rp3            | 12.30    | 5.25      | -          |
| <i>P. coatesi</i> | UF 271181      | Rp3            | 13.48    | 6.45      | -          |
| <i>P. coatesi</i> | UF 280222      | Rp3            | 12.47    | 6.17      | -          |
| <i>P. coatesi</i> | UF 271623      | Lp3            | 13.36    | 6.31      | -          |
| <i>P. coatesi</i> | UF 267123*     | Lp3            | 16.27    | 7.43      | -          |
| <i>P. coatesi</i> | UF 271182      | Rp4            | 10.76    | 7.43      | -          |
| <i>P. coatesi</i> | UF 271624*     | Rp4            | 11.67    | 7.45      | -          |
| <i>P. coatesi</i> | UF 223328*     | Rp4            | 9.90     | 6.50      | -          |
| <i>P. coatesi</i> | UF 271181      | Rp4            | 10.67    | 7.93      | -          |
| <i>P. coatesi</i> | UF 280222      | Rp4            | 8.95     | 7.34      | -          |

APPENDIX 1. (Continued).

| UF                |                   |                |          |           |            |
|-------------------|-------------------|----------------|----------|-----------|------------|
| Taxon             | Catalog<br>number | Tooth position | APL (mm) | TWmx (mm) | TWHyd (mm) |
| <i>P. coatesi</i> | UF 223094         | Lp4            | 9.96     | 7.56      | -          |
| <i>P. coatesi</i> | UF 271623         | Lp4            | 10.56    | 7.76      | -          |
| <i>P. coatesi</i> | UF 267124*        | Lp4            | 11.17    | 8.14      | -          |
| <i>P. coatesi</i> | UF 267123*        | Lp4            | 13.68    | 9.63      | -          |
| <i>P. coatesi</i> | UF 267125         | Lp4            | 10.66    | 7.72      | -          |
| <i>P. coatesi</i> | UF 280222         | Rm1            | 11.66    | 10.60     | -          |
| <i>P. coatesi</i> | UF 271182         | Rm1            | 11.90    | 10.96     | -          |
| <i>P. coatesi</i> | UF 271624*        | Rm1            | 14.13    | 10.50     | -          |
| <i>P. coatesi</i> | UF 223328*        | Rm1            | 10.26    | 8.81      | -          |
| <i>P. coatesi</i> | UF 271181         | Rm1            | 12.01    | 11.69     | -          |
| <i>P. coatesi</i> | UF 271623         | Lm1            | 11.55    | 9.66      | -          |
| <i>P. coatesi</i> | UF 237854         | Lm1            | 11.85    | 9.90      | -          |
| <i>P. coatesi</i> | UF 223094         | Lm1            | 12.21    | 10.61     | -          |
| <i>P. coatesi</i> | UF 267124*        | Lm1            | 12.29    | 11.47     | -          |
| <i>P. coatesi</i> | UF 267123*        | Lm1            | 12.66    | 12.39     | -          |
| <i>P. coatesi</i> | UF 236927         | Lm1            | 11.66    | 10.01     | -          |
| <i>P. coatesi</i> | UF 280222         | Rm2            | 12.36    | 12.02     | -          |
| <i>P. coatesi</i> | UF 271182         | Rm2            | 13.18    | 11.73     | -          |
| <i>P. coatesi</i> | UF 271624*        | Rm2            | 16.35    | 11.93     | -          |

APPENDIX 1. (Continued).

| Taxon             | UF<br>Catalog number | Tooth position | APL (mm) | TWmx (mm) | TWHyd (mm) |
|-------------------|----------------------|----------------|----------|-----------|------------|
| <i>P. coatesi</i> | UF 271181            | Rm2            | 13.22    | 13.39     | -          |
| <i>P. coatesi</i> | UF 223328*           | Rm2            | 12.77    | 9.92      | -          |
| <i>P. coatesi</i> | UF 271623            | Lm2            | 13.15    | 11.80     | -          |
| <i>P. coatesi</i> | UF 237854            | Lm2            | 13.71    | 12.63     | -          |
| <i>P. coatesi</i> | UF 223094            | Lm2            | 14.54    | 12.72     | -          |
| <i>P. coatesi</i> | UF 267124*           | Lm2            | 12.43    | 12.98     | -          |
| <i>P. coatesi</i> | UF 267123*           | Lm2            | 14.33    | 12.50     | -          |
| <i>P. coatesi</i> | UF 271182            | Rm3            | 17.98    | 11.52     | 6.89-      |
| <i>P. coatesi</i> | UF 271624*           | Rm3            | 19.22    | 12.53     | 6.77       |
| <i>P. coatesi</i> | UF 223328*           | Rm3            | 19.70    | 9.90      | 6.84       |
| <i>P. coatesi</i> | UF 271596            | Rm3            | 17.99    | 11.23     | 6.53       |
| <i>P. coatesi</i> | UF 271623            | Lm3            | 18.12    | 10.95     | 6.91       |
| <i>P. coatesi</i> | UF 237854            | Lm3            | 20.62    | 11.82     | 7.01       |
| <i>P. coatesi</i> | UF 223094            | Lm3            | 17.92    | 12.72     | 7.15       |
| <i>P. coatesi</i> | UF 267124*           | Lm3            | 16.18    | 12.67     | 6.70       |
| <i>P. coatesi</i> | UF 267123*           | Lm3            | 21.75    | 13.01     | 6.90       |
| <i>P. coatesi</i> | UF 271150            | Lm3            | 17.38    | 12.03     | 7.10       |
| <i>P. orarius</i> | UF 237878            | Lm1            | 9.25     | 7.18      | -          |
| <i>P. orarius</i> | UF 237878            | Lm2            | 10.42    | 8.01      | -          |

APPENDIX 1. (Continued).

| Taxon                   | UF<br>Catalog number | Tooth position | APL (mm) | TWmx (mm) | TWHyd (mm) |
|-------------------------|----------------------|----------------|----------|-----------|------------|
| <i>P. orarius</i>       | UF 237878            | Lm3            | 13.95    | 8.18      | 4.98       |
| <i>P. orarius</i>       | UF 271625            | Rp3            | 10.73    | 4.27      | -          |
| <i>P. orarius</i>       | UF 271625            | Rp4            | 8.45     | 5.37      | -          |
| <i>P. orarius</i>       | UF 271625            | Rm1            | 9.42     | 7.61      | -          |
| <i>P. orarius</i>       | UF 271625            | Rm2            | 10.05    | 8.40      | -          |
| <i>P. orarius</i>       | UF 271625            | Rm3            | 15.36    | 8.43      | -          |
| <i>P. orarius</i>       | UF 280222            | Rm2            | 9.84     | 7.62      | -          |
| <i>P. orarius</i>       | UF 280223            | Lm2            | 9.70     | 7.84      | -          |
| <i>P. aff. tedfordi</i> | UF 254121            | Lm2            | 12.97    | 10.20     | -          |
| <i>P. aff. tedfordi</i> | UF 271179            | Lm2            | 13.51    | 10.32     | -          |
| <i>P. aff. tedfordi</i> | UF 254119            | Rp4            | 10.54    | 6.50      | -          |
| <i>P. aff. tedfordi</i> | UF 271622            | Lm2            | 14.60    | 10.66     | -          |
| <i>P. aff. tedfordi</i> | UF 271627            | Rm2            | 13.88    | 10.77     | -          |
| <i>P. aff. tedfordi</i> | UF 267194            | Rp4            | 11.60    | 7.01      | -          |
| <i>P. aff. tedfordi</i> | UF 267194            | Rm1            | 10.55    | 9.24      | -          |
| <i>P. aff. tedfordi</i> | UF 267194            | Rm2            | 12.12    | 11.27     | -          |
| <i>P. aff. tedfordi</i> | UF 267194            | Rm3            | 18.12    | 10.67     | 6.85       |
| <i>P. aff. tedfordi</i> | UF 275168            | Lm2            | 13.84    | 10.11     | -          |
| <i>P. aff. tedfordi</i> | UF 275168            | Lm3            | 21.08    | 10.40     | 6.56-      |

APPENDIX 1. (Continued).

| Taxon                   | UF<br>Catalog number | Tooth position | APL (mm) | TWmx (mm) | TWHyd (mm) |
|-------------------------|----------------------|----------------|----------|-----------|------------|
| <i>P. aff. tedfordi</i> | UF 241199            | LP2            | 12.22    | 8.70      | -          |
| <i>P. aff. tedfordi</i> | UF 271626            | RP3            | 10.41    | 5.97      | -          |
| <i>P. aff. tedfordi</i> | UF 236931            | LM2            | 13.03    | 16.68     | -          |
| <i>P. aff. tedfordi</i> | UF 271618            | RP4            | 8.78     | 11.01     | -          |
| <i>P. coatesi</i>       | UF 237877            | RP2            | 12.63    | 6.18      | -          |
| <i>P. coatesi</i>       | UF 237877            | RP3            | 12.65    | 8.58      | -          |
| <i>P. coatesi</i>       | UF 223584            | LP3            | 11.79    | 8.46      | -          |
| <i>P. coatesi</i>       | UF 236913            | RP4            | 8.22     | 13.47     | -          |
| <i>P. coatesi</i>       | UF 237877            | RP4            | 9.41     | 12.30     | -          |
| <i>P. coatesi</i>       | UF 223585            | RP4            | 8.83     | 13.83     | -          |
| <i>P. coatesi</i>       | UF 223584            | LP4            | 7.79     | 11.53     | -          |
| <i>P. coatesi</i>       | UF 236913            | RM1            | 11.06    | 14.48     | -          |
| <i>P. coatesi</i>       | UF 223585            | RM1            | 10.81    | 14.80     | -          |
| <i>P. coatesi</i>       | UF 237862            | LM1            | 11.29    | 14.34     | -          |
| <i>P. coatesi</i>       | UF 223326            | LM1            | 11.37    | 15.73     | -          |
| <i>P. coatesi</i>       | UF 223584            | LM1            | 10.99    | 13.49     | -          |
| <i>P. coatesi</i>       | UF 223585            | LM1            | 11.04    | 15.03     | -          |

APPENDIX 1. (Continued).

---

| Taxon             | UF<br>Catalog number | Tooth position | APL (mm) | TWmx (mm) | TWHyd (mm) |
|-------------------|----------------------|----------------|----------|-----------|------------|
| <hr/>             |                      |                |          |           |            |
| <i>P. coatesi</i> | UF 237877            | RM2            | 12.83    | 16.44     | -          |
| <i>P. coatesi</i> | UF 223585            | RM2            | 12.92    | 17.77     | -          |
| <i>P. coatesi</i> | UF 223326            | LM2            | 11.92    | 17.16     | -          |
| <i>P. coatesi</i> | UF 223585            | LM2            | 12.82    | 17.94     | -          |
| <i>P. coatesi</i> | UF 236917            | RM3            | 13.36    | 17.65     | -          |
| <i>P. coatesi</i> | UF 237877            | RM3            | 11.79    | 16.08     | -          |
| <i>P. coatesi</i> | UF 223585            | RM3            | 12.26    | 17.21     | -          |
| <i>P. coatesi</i> | UF 223326            | LM3            | 11.63    | 16.18     | -          |
| <i>P. coatesi</i> | UF 280221            | RM3            | 13.58    | 16.18     | -          |
| <i>P. coatesi</i> | UF 223585            | LM3            | 12.43    | 16.91     | -          |
| <i>P. coatesi</i> | UF 275284            | RM3            | 13.30    | 17.80     | -          |

---
